# Supplementary material for: Machine Learning-based Individual Assessment of Cortical Atrophy Pattern in Alzheimer’s Disease Spectrum: Development of the Classifier and Longitudinal Evaluation
Source: PubMed Central journal article supplement (PMC5841386; doi:10.1038/s41598-018-22277-x), 2018-03-07
Supplement: 41598_2018_22277_MOESM1_ESM.pdf [file 41598_2018_22277_MOESM1_ESM.pdf]

# **Machine Learning-based Individual Assessment of Cortical Atrophy Pattern in Alzheimer's Disease Spectrum: Development of the Classifier and Longitudinal Evaluation**

Jin San Lee,<sup>1-3,\*</sup> Changsoo Kim,<sup>4,\*</sup> Jeong-Hyeon Shin,<sup>5,\*</sup> Hanna Cho,<sup>7</sup> Dae-seock Shin,<sup>8</sup>  
Nakyoun Kim,<sup>8</sup> Hee Jin Kim,<sup>1,2</sup> Yeshin Kim,<sup>1,2</sup> Samuel N. Lockhart,<sup>9,10</sup> Duk L. Na,<sup>1,2,11</sup> Sang  
Won Seo,<sup>1,2,11,12,†</sup> Joon-Kyung Seong<sup>5,6,†</sup>

<sup>1</sup>Department of Neurology, Samsung Medical Center, Sungkyunkwan University School of  
Medicine, Seoul 06351, Korea

<sup>2</sup>Neuroscience Center, Samsung Medical Center 06351, Seoul, Korea

<sup>3</sup>Department of Neurology, Kyung Hee University Hospital, Seoul, Korea

<sup>4</sup>Department of Preventive Medicine, Yonsei University College of Medicine, Seoul, South  
Korea

<sup>5</sup>Department of Bio-convergence Engineering, <sup>6</sup>School of Biomedical Engineering, Korea  
University, Seoul, Korea

<sup>7</sup>Department of Neurology, Gangnam Severance Hospital, Yonsei University College of  
Medicine, Seoul, Korea

<sup>8</sup>MIDAS Information Technology Co., Ltd.

<sup>9</sup>Department of Internal Medicine, Section on Gerontology and Geriatric Medicine, Wake  
Forest School of Medicine, Winston-Salem, NC, USA

<sup>10</sup>Department of Internal Medicine, Division of Gerontology and Geriatric Medicine, Wake  
Forest School of Medicine, Winston-Salem, NC 27157, USA

<sup>11</sup>Department of Health Sciences and Technology, <sup>12</sup>Clinical Research Design and Evaluation,

SAIHST, Sungkyunkwan University, Seoul 06351, Korea

\* These authors contributed equally as first authors of the paper.

† These authors contributed equally as corresponding authors of the paper.

**Corresponding author 1:** Joon-Kyung Seong, PhD

School of Biomedical Engineering, Korea University, 145, Anam-ro, Anam-dong 5-ga,  
Seongbuk-gu, Seoul 02841, Korea.

Tel: +82-2-3290-5660, Fax: +82-2-921-6434, E-mail address: jkseong@korea.ac.kr

**Corresponding author 2:** Sang Won Seo, MD, PhD

Department of Neurology, Samsung Medical Center, Sungkyunkwan University School of  
Medicine, 81 Irwon-ro, Kangnam-ku, Seoul 06351, Korea

Tel: +82-2-3410-1233, Fax: +82-2-3410-0052, E-mail address: sangwonseo@empal.com

**Supplementary data:** Supplementary Table 1 and Supplementary Figure 1

**Supplementary Table 1** Comparison of results of the AD-specific atrophy similarity and neuropsychological tests during their years of follow-up in patients with aMCI and AD

|                                       | Patients with aMCI |                |              | Patients with AD |                |                | p-value |
|---------------------------------------|--------------------|----------------|--------------|------------------|----------------|----------------|---------|
|                                       | Total              | Non-converters | Converters   | Total            | Slow-decliners | Fast-decliners |         |
| <b>AD-specific atrophy similarity</b> |                    |                |              |                  |                |                |         |
| <b>Baseline</b>                       | 41.1 (8.7)         | 39.4 (7.5)     | 44.7 (10.0)  | 48.9 (10.6)      | 43.9 (9.5)     | 54.4 (9.1)     | a, b    |
| <b>1<sup>st</sup> year follow-up</b>  | 44.0 (9.9)         | 40.9 (7.6)     | 49.9 (11.2)  | 51.5 (11.0)      | 45.9 (10.0)    | 57.6 (8.9)     | a, b    |
| <b>3<sup>rd</sup> year follow-up</b>  |                    |                |              | 53.9 (12.0)      | 47.5 (10.6)    | 60.9 (9.5)     | b       |
| <b>Neuropsychological tests</b>       |                    |                |              |                  |                |                |         |
| <b>Baseline</b>                       |                    |                |              |                  |                |                |         |
| <b>N</b>                              | 79                 | 53 (67.1)      | 26 (32.9)    | 27               | 14 (51.9)      | 13 (48.1)      |         |
| <b>Attention</b>                      | 9.3 (2.3)          | 9.5 (2.3)      | 9.0 (2.1)    | 8.1 (1.4)        | 7.7 (1.5)      | 8.6 (1.0)      |         |
| <b>Language</b>                       | 20.9 (3.5)         | 21.4 (3.2)     | 19.8 (4.1)   | 18.3 (4.7)       | 18.1 (4.7)     | 18.5 (4.9)     |         |
| <b>Visuospatial</b>                   | 30.1 (6.1)         | 31.3 (4.2)     | 27.7 (8.4)   | 27.0 (10.9)      | 29.6 (9.2)     | 24.1 (12.1)    |         |
| <b>Memory</b>                         | 51.3 (16.5)        | 56.6 (14.9)    | 40.8 (14.6)  | 29.4 (11.6)      | 32.5 (12.4)    | 26.1 (10.1)    | a       |
| <b>Frontal/executive</b>              | 36.7 (10.0)        | 38.5 (9.2)     | 33.0 (10.7)  | 36.5 (11.1)      | 38.4 (11.9)    | 34.5 (10.2)    | a       |
| <b>SNSB-D total</b>                   | 149.7 (26.0)       | 157.8 (20.6)   | 133.2 (28.4) | 119.4 (28.3)     | 126.4 (29.4)   | 111.8 (26.0)   | a       |
| <b>MMSE</b>                           | 26.4 (2.4)         | 27.0 (1.9)     | 25.4 (3.0)   | 21.4 (3.1)       | 21.1 (3.0)     | 21.7 (3.3)     | a       |
| <b>CDR</b>                            | 0.5 (0.1)          | 0.5 (0.2)      | 0.5 (0.0)    | 0.8 (0.3)        | 0.8 (0.3)      | 0.8 (0.3)      | a       |
| <b>CDR-SB</b>                         | 1.2 (0.8)          | 1.0 (0.8)      | 1.6 (0.8)    | 4.7 (1.8)        | 4.4 (1.4)      | 5.0 (2.2)      | a       |
| <b>1<sup>st</sup> year follow-up</b>  |                    |                |              |                  |                |                |         |
| <b>N</b>                              | 66                 | 43 (65.2)      | 23 (34.8)    | 25               | 13 (52.0)      | 12 (48.0)      |         |
| <b>Attention</b>                      | 8.9 (2.1)          | 9.4 (1.9)      | 7.9 (2.3)    | 8.0 (1.9)        | 7.9 (2.2)      | 8.1 (1.6)      |         |
| <b>Language</b>                       | 20.6 (4.0)         | 21.2 (3.8)     | 18.8 (4.3)   | 16.9 (5.4)       | 17.9 (4.8)     | 15.8 (6.0)     | b       |
| <b>Visuospatial</b>                   | 29.2 (7.5)         | 30.7 (5.6)     | 25.0 (10.4)  | 25.4 (11.1)      | 29.8 (7.6)     | 20.7 (12.6)    | b       |
| <b>Memory</b>                         | 49.3 (18.1)        | 52.7 (17.4)    | 39.8 (17.5)  | 28.0 (12.4)      | 32.5 (12.5)    | 23.1 (10.7)    | b       |
| <b>Frontal/executive</b>              | 37.7 (11.5)        | 40.4 (9.5)     | 30.2 (13.9)  | 34.7 (11.7)      | 39.4 (8.6)     | 29.7 (12.9)    | a, b    |
| <b>SNSB-D total</b>                   | 145.5 (29.9)       | 152.7 (26.1)   | 128.6 (32.4) | 113.0 (33.1)     | 127.4 (26.0)   | 97.4 (33.8)    | a, b    |
| <b>MMSE</b>                           | 25.3 (3.9)         | 26.8 (2.5)     | 22.3 (4.4)   | 19.9 (4.0)       | 20.7 (2.8)     | 19.1 (4.9)     | a       |
| <b>CDR</b>                            | 0.6 (0.3)          | 0.5 (0.1)      | 0.7 (0.4)    | 0.9 (0.5)        | 0.8 (0.3)      | 1.1 (0.5)      | a, b    |
| <b>CDR-SB</b>                         | 2.1 (1.8)          | 1.3 (0.9)      | 3.5 (2.1)    | 5.7 (2.6)        | 4.7 (1.8)      | 6.7 (2.9)      | a, b    |
| <b>3<sup>rd</sup> year follow-up</b>  |                    |                |              |                  |                |                |         |
| <b>N</b>                              |                    |                |              | 27               | 14 (51.9)      | 13 (48.1)      |         |
| <b>Attention</b>                      |                    |                |              | 6.4 (2.7)        | 7.3 (1.8)      | 5.5 (3.3)      |         |
| <b>Language</b>                       |                    |                |              | 12.9 (7.4)       | 16.3 (5.6)     | 9.2 (7.6)      | b       |
| <b>Visuospatial</b>                   |                    |                |              | 17.6 (14.4)      | 24.5 (11.5)    | 10.2 (13.9)    | b       |

|                          |             |              |             |              |
|--------------------------|-------------|--------------|-------------|--------------|
| <b>Memory</b>            | 21.0 (13.5) | 28.5 (11.8)  | 12.9 (10.6) | <sup>b</sup> |
| <b>Frontal/executive</b> | 26.3 (15.4) | 35.6 (10.1)  | 16.2 (13.8) | <sup>b</sup> |
| <b>SNSB-D total</b>      | 84.1 (48.7) | 112.2 (32.2) | 53.9 (45.8) | <sup>b</sup> |
| <b>MMSE</b>              | 15.9 (6.5)  | 18.9 (4.5)   | 12.5 (6.9)  | <sup>b</sup> |
| <b>CDR</b>               | 1.6 (0.8)   | 1.0 (0.4)    | 2.2 (0.6)   | <sup>b</sup> |
| <b>CDR-SB</b>            | 9.3 (4.2)   | 6.1 (2.4)    | 12.6 (2.9)  | <sup>b</sup> |

Values are mean (SD) or N (%). Age and education were included as covariates for analyses of covariance, in comparison of the AD-specific atrophy similarity and neuropsychological test performances among the groups.

<sup>a</sup>p < 0.05 with Bonferroni's post hoc analyses comparing non-converters and converters in patients with aMCI.

<sup>b</sup>p < 0.05 with Bonferroni's post hoc analyses comparing slow- and fast-decliners in patients with AD.

Abbreviations: N = number; SD = standard deviation; AD = Alzheimer's disease; aMCI = amnesic mild cognitive impairment; SNSB-D = Seoul Neuropsychological Screening Battery-Dementia version; MMSE = mini-mental state examination; CDR = Clinical Dementia Rating; CDR-SB = Clinical Dementia Rating sum of boxes.

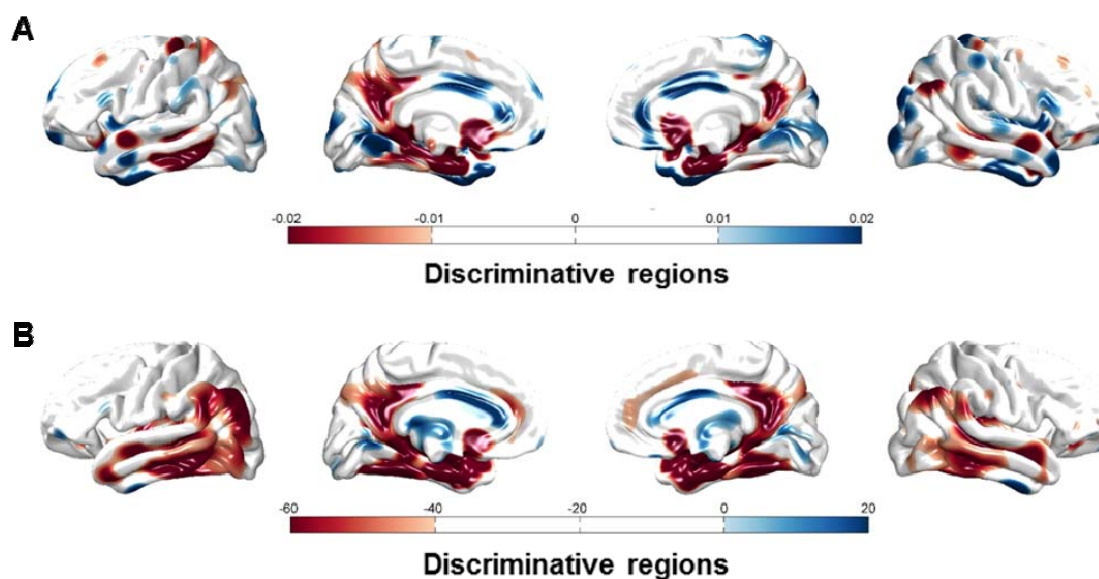

**Supplementary Figure 1** Comparison of the discriminative regions between the (A) PCA/LDA- and (B) SVM-based methods. Color intensities in the figure represent discriminative power in AD classification. In the case of the linear SVM, the value of the  $i$ -th component of the vector  $v$  that is orthogonal to the separating hyperplane represents the contribution of the component to classification. The discriminative regions for both classifiers are consistent with each other.

PCA = principal component analysis; LDA = linear discriminant analysis; SVM = support vector machine; AD = Alzheimer's disease.
